# Supplementary material for: Fracture Rate, Quality of Life and Back Pain in Patients with Osteoporosis Treated with Teriparatide: 24-Month Results from the Extended Forsteo Observational Study (ExFOS)
Source: PubMed Central journal article supplement (PMC4960288; doi:10.1007/s00223-016-0143-5), 2016-04-30
Supplement: 223_2016_143_MOESM2_ESM.pdf [file 223_2016_143_MOESM2_ESM.pdf]

**Online Resource 2:** Clinical vertebral and non-vertebral fractures during teriparatide treatment (0 to 24 months) for the active treatment cohort

| Time interval (months)                                                                 | N <sup>a</sup> | Number of fractures per 10,000 patient years | Total number of fractures | Patients with ≥1 fracture, <i>n</i> (%) <sup>b</sup> | Odds of fracture (95% CI) <sup>c</sup> | Odds ratio <sup>c,d</sup> (95% CI) | <i>p</i> value <sup>d</sup> |
|----------------------------------------------------------------------------------------|----------------|----------------------------------------------|---------------------------|------------------------------------------------------|----------------------------------------|------------------------------------|-----------------------------|
| <b><i>Clinical vertebral fractures</i></b>                                             |                |                                              |                           |                                                      |                                        |                                    |                             |
| 0 to 6                                                                                 | 1454           | 237                                          | 17                        | 16 (1.1)                                             | 0.006 (0.002–0.017)                    | -                                  | -                           |
| >6 to 12                                                                               | 1384           | 45                                           | 3                         | 2 (0.1)                                              | 0.001 (0.000–0.004)                    | 0.13 (0.03–0.57)                   | 0.007                       |
| >12 to 18                                                                              | 1295           | 48                                           | 3                         | 3 (0.2)                                              | 0.001 (0.000–0.005)                    | 0.21 (0.06–0.72)                   | 0.013                       |
| >18 to 24                                                                              | 1087           | 73                                           | 3                         | 3 (0.3)                                              | 0.001 (0.000–0.006)                    | 0.25 (0.07–0.87)                   | 0.029                       |
| Total <sup>e</sup>                                                                     | 1454           |                                              | 26                        | 24 (1.7)                                             |                                        |                                    |                             |
| <b><i>Non-vertebral fractures</i></b>                                                  |                |                                              |                           |                                                      |                                        |                                    |                             |
| 0 to 6                                                                                 | 1454           | 433                                          | 31                        | 29 (2.0)                                             | 0.010 (0.005–0.021)                    | -                                  | -                           |
| >6 to 12                                                                               | 1384           | 416                                          | 28                        | 26 (1.9)                                             | 0.009 (0.004–0.020)                    | 0.94 (0.56–1.56)                   | 0.800                       |
| >12 to 18                                                                              | 1295           | 353                                          | 22                        | 20 (1.5)                                             | 0.008 (0.003–0.018)                    | 0.77 (0.44–1.34)                   | 0.348                       |
| >18 to 24                                                                              | 1087           | 363                                          | 15                        | 14 (1.3)                                             | 0.006 (0.003–0.016)                    | 0.64 (0.33–1.22)                   | 0.177                       |
| Total <sup>e</sup>                                                                     | 1454           |                                              | 96                        | 82 (5.6)                                             |                                        |                                    |                             |
| <b><i>Main non-vertebral fractures (forearm/wrist, hip, humerus, leg and ribs)</i></b> |                |                                              |                           |                                                      |                                        |                                    |                             |
| 0 to 6                                                                                 | 1454           | 321                                          | 23                        | 21 (1.4)                                             | 0.006 (0.002–0.018)                    | -                                  | -                           |
| >6 to 12                                                                               | 1384           | 283                                          | 19                        | 18 (1.3)                                             | 0.006 (0.002–0.016)                    | 0.90 (0.49–1.64)                   | 0.721                       |
| >12 to 18                                                                              | 1295           | 209                                          | 13                        | 13 (1.0)                                             | 0.004 (0.002–0.013)                    | 0.69 (0.35–1.36)                   | 0.283                       |
| >18 to 24                                                                              | 1087           | 315                                          | 13                        | 13 (1.2)                                             | 0.005 (0.002–0.018)                    | 0.83 (0.41–1.67)                   | 0.601                       |
| Total <sup>e</sup>                                                                     | 1454           |                                              | 68                        | 61 (4.2)                                             |                                        |                                    |                             |

<sup>a</sup>N = all patients with information regarding fractures within the time window

<sup>b</sup>As some patients experienced a fracture in more than one time interval, the total was not the sum of patients with a fracture in each interval

<sup>c</sup>Adjusted model by gender, age, prior bisphosphonate/denosumab use, and history of vertebral or non-vertebral fracture in the 12 months before starting teriparatide.

<sup>d</sup>Compared with 0- to 6-month interval

<sup>e</sup>All fractures from treatment start to end of treatment within the 24 months are included

CI, confidence interval
