# Supplementary material for: Fracture Rate, Quality of Life and Back Pain in Patients with Osteoporosis Treated with Teriparatide: 24-Month Results from the Extended Forsteo Observational Study (ExFOS)
Source: PubMed Central journal article supplement (PMC4960288; doi:10.1007/s00223-016-0143-5), 2016-04-30
Supplement: 223_2016_143_MOESM3_ESM.pdf [file 223_2016_143_MOESM3_ESM.pdf]

### Online Resource 3: HRQoL: EQ-5D domains

|                               | <b>Baseline</b><br>( <i>N</i> = 1454) | <b>3 months</b><br>( <i>N</i> = 1259) | <b>6 months</b><br>( <i>N</i> = 1289) | <b>12 months</b><br>( <i>N</i> = 1242) | <b>18 months</b><br>( <i>N</i> = 1004) | <b>24 months</b><br>( <i>N</i> = 321) |
|-------------------------------|---------------------------------------|---------------------------------------|---------------------------------------|----------------------------------------|----------------------------------------|---------------------------------------|
| <b>Mobility</b>               | ( <i>n</i> = 1409) <sup>a</sup>       | ( <i>n</i> = 1178)                    | ( <i>n</i> = 1191)                    | ( <i>n</i> = 1127)                     | ( <i>n</i> = 899)                      | ( <i>n</i> = 259)                     |
| No problem, <i>n</i> (%)      | 568 (40.3)                            | 590 (50.1)                            | 659 (55.3)                            | 671 (59.5)                             | 595 (66.2)                             | 167 (64.5)                            |
| Some problem, <i>n</i> (%)    | 792 (56.2)                            | 568 (48.2)                            | 525 (44.1)                            | 451 (40.0)                             | 302 (33.6)                             | 91 (35.1)                             |
| Extreme problem, <i>n</i> (%) | 49 (3.5)                              | 20 (1.7)                              | 7 (0.6)                               | 5 (0.4)                                | 2 (0.2)                                | 1 (0.4)                               |
| <b>Self-care</b>              | ( <i>n</i> = 1405)                    | ( <i>n</i> = 1175)                    | ( <i>n</i> = 1190)                    | ( <i>n</i> = 1126)                     | ( <i>n</i> = 897)                      | ( <i>n</i> = 258)                     |
| No problem, <i>n</i> (%)      | 910 (64.8)                            | 856 (72.9)                            | 933 (78.4)                            | 910 (80.8)                             | 743 (82.8)                             | 216 (83.7)                            |
| Some problem, <i>n</i> (%)    | 434 (30.9)                            | 294 (25.0)                            | 235 (19.7)                            | 203 (18.0)                             | 143 (15.9)                             | 38 (14.7)                             |
| Extreme problem, <i>n</i> (%) | 61 (4.3)                              | 25 (2.1)                              | 22 (1.8)                              | 13 (1.2)                               | 11 (1.2)                               | 4 (1.6)                               |
| <b>Usual activity</b>         | ( <i>n</i> = 1406)                    | ( <i>n</i> = 1179)                    | ( <i>n</i> = 1193)                    | ( <i>n</i> = 1130)                     | ( <i>n</i> = 899)                      | ( <i>n</i> = 259)                     |
| No problem, <i>n</i> (%)      | 433 (30.8)                            | 544 (46.1)                            | 578 (48.4)                            | 629 (55.7)                             | 528 (58.7)                             | 144 (55.6)                            |
| Some problem, <i>n</i> (%)    | 784 (55.8)                            | 561 (47.6)                            | 548 (45.9)                            | 454 (40.2)                             | 336 (37.4)                             | 97 (37.5)                             |
| Extreme problem, <i>n</i> (%) | 189 (13.4)                            | 74 (6.3)                              | 67 (5.6)                              | 47 (4.2)                               | 35 (3.9)                               | 18 (6.9)                              |
| <b>Pain and discomfort</b>    | ( <i>n</i> = 1410)                    | ( <i>n</i> = 1179)                    | ( <i>n</i> = 1193)                    | ( <i>n</i> = 1126)                     | ( <i>n</i> = 899)                      | ( <i>n</i> = 259)                     |
| None, <i>n</i> (%)            | 178 (12.6)                            | 257 (21.8)                            | 349 (29.3)                            | 386 (34.3)                             | 374 (41.6)                             | 119 (45.9)                            |
| Moderate, <i>n</i> (%)        | 938 (66.5)                            | 804 (68.2)                            | 772 (64.7)                            | 682 (60.6)                             | 492 (54.7)                             | 134 (51.7)                            |
| Extreme, <i>n</i> (%)         | 294 (20.9)                            | 118 (10.0)                            | 72 (6.0)                              | 58 (5.2)                               | 33 (3.7)                               | 6 (2.3)                               |
| <b>Anxiety and depression</b> | ( <i>n</i> = 1406)                    | ( <i>n</i> = 1176)                    | ( <i>n</i> = 1189)                    | ( <i>n</i> = 1124)                     | ( <i>n</i> = 898)                      | ( <i>n</i> = 258)                     |
| None, <i>n</i> (%)            | 606 (43.1)                            | 610 (51.9)                            | 664 (55.8)                            | 642 (57.1)                             | 550 (61.2)                             | 176 (68.2)                            |
| Moderate, <i>n</i> (%)        | 667 (47.4)                            | 496 (42.2)                            | 471 (39.6)                            | 430 (38.3)                             | 314 (35.0)                             | 78 (30.2)                             |
| Extreme, <i>n</i> (%)         | 133 (9.5)                             | 70 (6.0)                              | 54 (4.5)                              | 52 (4.6)                               | 34 (3.8)                               | 4 (1.6)                               |

<sup>a</sup>Number of patients with non-missing entries (denominator for percentages) for all domains at all time points
